# Supplementary material
Source: Springer Nature journal article supplement (https://www.springermedizin.de/resource/supplementary/12905_2014_491_MOESM1_ESM.pdf/9518632)
Supplement: MOESM1 [file 9518632]

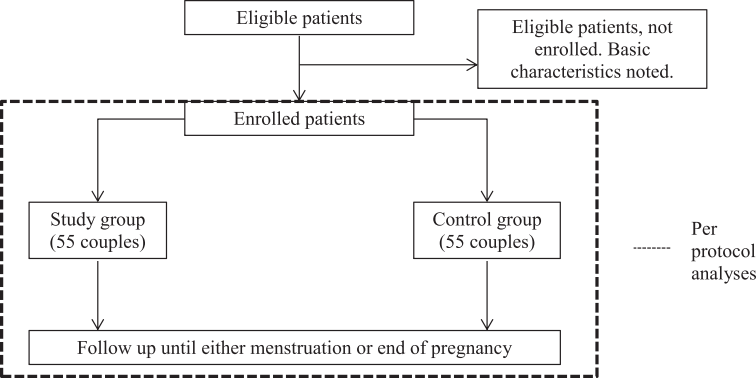

Eligible patients

Eligible patients, not  
enrolled. Basic  
characteristics noted.

Enrolled patients

Study group  
(55 couples)

Control group  
(55 couples)

Follow up until either menstruation or end of pregnancy

-----  
Per  
protocol  
analyses
